# Supplementary material for: Event-related potential and EEG oscillatory predictors of verbal memory in mild cognitive impairment
Source: PubMed Central journal article supplement — Brain Commun. 2020 Dec 10;2(2):fcaa213. doi: 10.1093/braincomms/fcaa213 (PMC7749791; doi:10.1093/braincomms/fcaa213), 2020-12-10
Supplement: fcaa213_supplementary_data.pdf [file fcaa213_supplementary_data.pdf]

**Supplementary Table 1. Pearson correlations between the EEG/ERP measures and CVLT scores across all subjects separated for congruency.**

| California Verbal Learning Test | P600 repetition effect |          |           |          |             |          | Alpha repetition effect |          |           |          |             |          | Theta-alpha/beta coupling |          |           |          |             |          |
|---------------------------------|------------------------|----------|-----------|----------|-------------|----------|-------------------------|----------|-----------|----------|-------------|----------|---------------------------|----------|-----------|----------|-------------|----------|
|                                 | Overall                |          | Congruous |          | Incongruous |          | Overall                 |          | Congruous |          | Incongruous |          | Overall                   |          | Congruous |          | Incongruous |          |
|                                 | <i>r</i>               | <i>p</i> | <i>r</i>  | <i>p</i> | <i>r</i>    | <i>p</i> | <i>r</i>                | <i>p</i> | <i>r</i>  | <i>p</i> | <i>r</i>    | <i>p</i> | <i>r</i>                  | <i>p</i> | <i>r</i>  | <i>p</i> | <i>r</i>    | <i>p</i> |
| Age                             | -.05                   | .780     | -.16      | .358     | .08         | .650     | .03                     | .844     | -.08      | .636     | .12         | .498     | .11                       | .544     | .33       | .053     | -.21        | .228     |
| Education                       | -.27                   | .117     | -.28      | .105     | .27         | .114     | .01                     | .948     | .17       | .320     | -.17        | .333     | .16                       | .341     | .13       | .439     | .11         | .532     |
| List A, trials 1-5              | .49**                  | .003     | .55***    | <.001    | .06         | .74      | -.40*                   | .016     | -.21      | 0.22     | -.39*       | .02      | -.32                      | .059     | -.53**    | .001     | .20         | .248     |
| Short Delay Free Recall         | .35*                   | .038     | .43**     | .009     | .08         | .66      | -.45**                  | .006     | -.24      | 0.16     | -.43*       | .01      | -.20                      | .251     | -.50**    | .002     | .31         | .070     |
| Short Delay Cued Recall         | .39*                   | .018     | .53**     | .001     | .13         | .45      | -.40*                   | .017     | -.23      | 0.17     | -.33*       | .05      | -.21                      | .230     | -.46**    | .004     | .26         | .134     |
| Long Delay Free Recall          | .42*                   | .011     | .55**     | .001     | .09         | .60      | -.44**                  | .008     | -.26      | 0.13     | -.36*       | .03      | -.23                      | .169     | -.51**    | .002     | .27         | .110     |
| Long Delay Cued Recall          | .42*                   | .011     | .59***    | <.001    | .12         | .50      | -.47**                  | .004     | -.29      | 0.09     | -.39*       | .02      | -.20                      | .238     | -.49**    | .002     | .29         | .087     |
| discriminability                | .41*                   | .012     | .53**     | .001     | .04         | .83      | -.33*                   | .047     | -.27      | 0.11     | -.23        | .18      | -.18                      | .289     | -.54**    | .001     | .37*        | .027     |

\**p* < .05; \*\**p* < .01; \*\*\**p* < .001

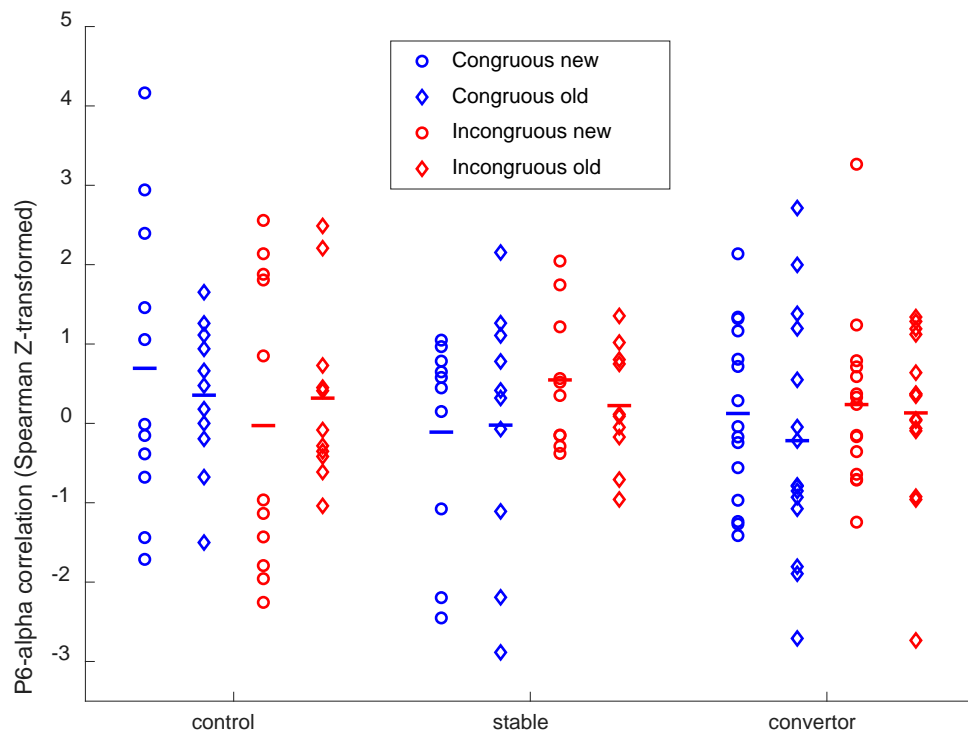

**Supplementary Figure 1.** Z transformed trial-by-trial correlation coefficients between P600 and alpha power change (Pz) for each participant separated for congruency (congruous vs incongruous), repetition (old vs new), and participant group (control, MCI stable, MCI convertor). Horizontal lines represent the mean correlation for each condition and each group.

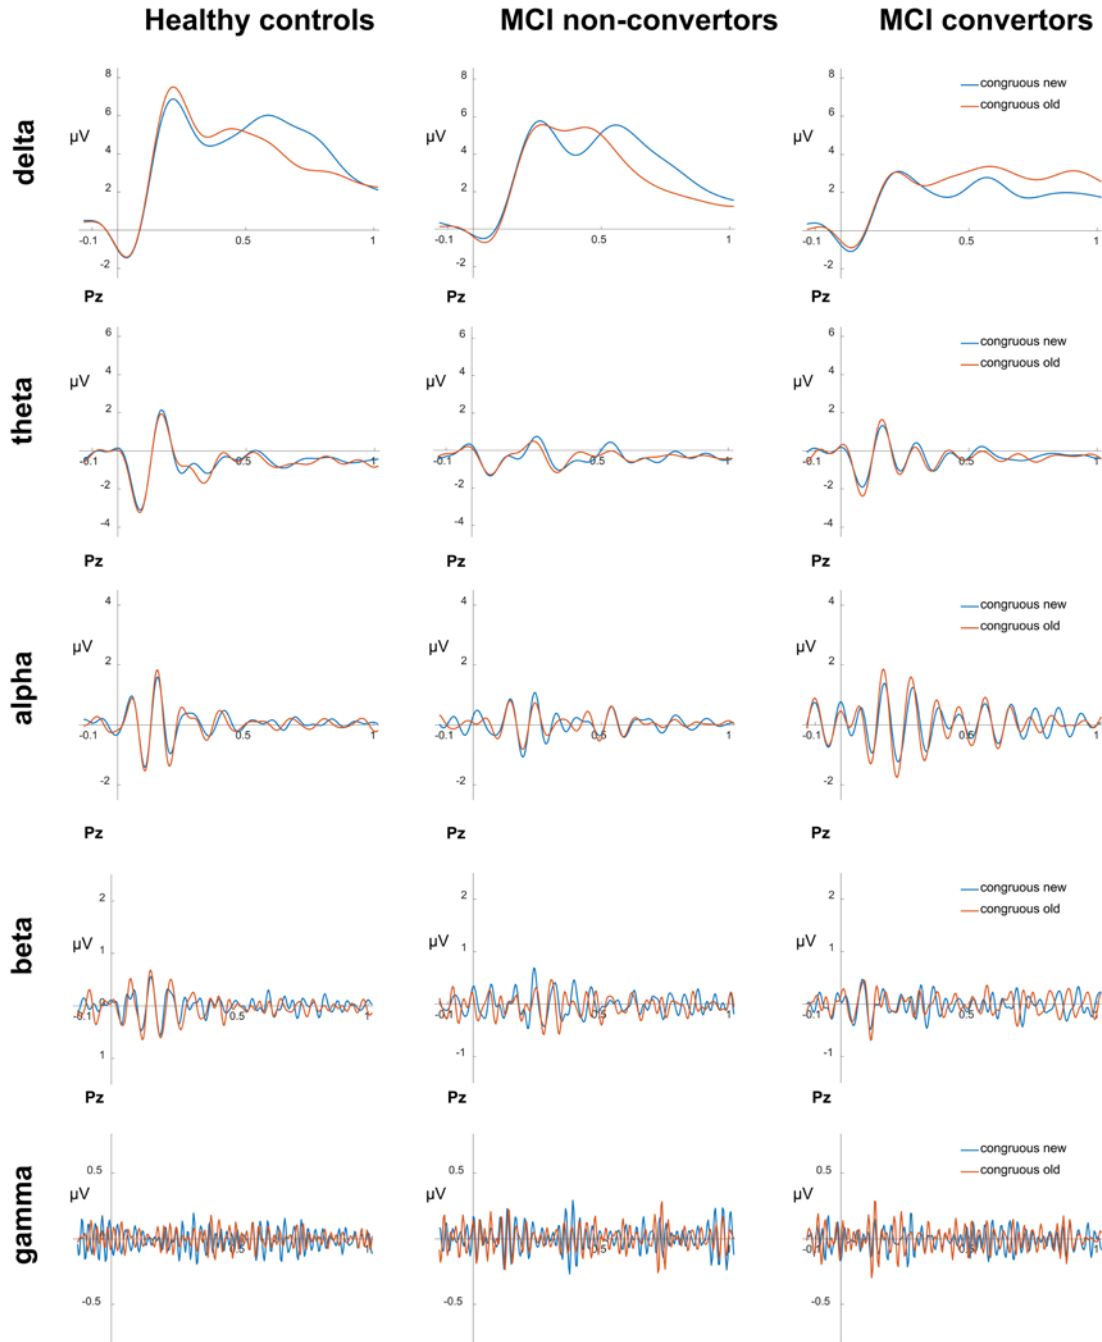

**Supplementary Figure 2.** Bandpass-filtered ERP waveforms elicited by new and repeated semantically congruous words at electrode site midline parietal (Pz) for the 3 groups.

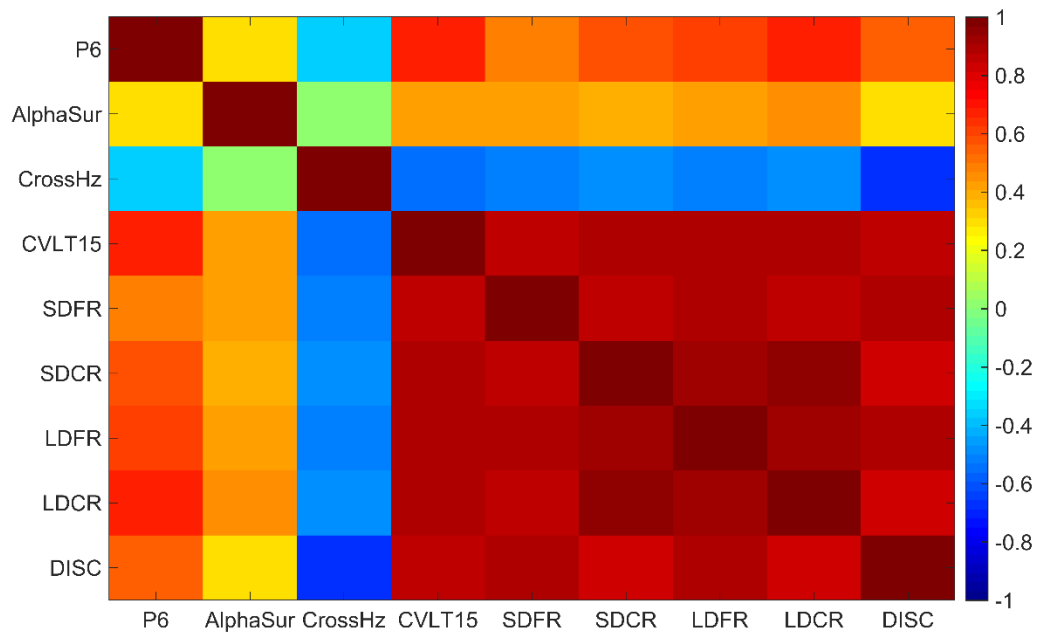

**Supplementary Figure 3.** Correlation coefficients ( $r$ ) between all EEG/ERP and CVLT measures across all participants. Abbreviations: P600 congruous repetition effect (P600), alpha suppression repetition effect (AlphaSur), cross-frequency coupling (CrossHz), CVLT list A, trial 1-5 (CVLT15), CVLT short delay free recall (SDFR), CVLT short delay cued recall (SDCR), CVLT long delay free recall (LDFR), CVLT long delay cued recall (LDCR), CVLT discriminability (DISC).

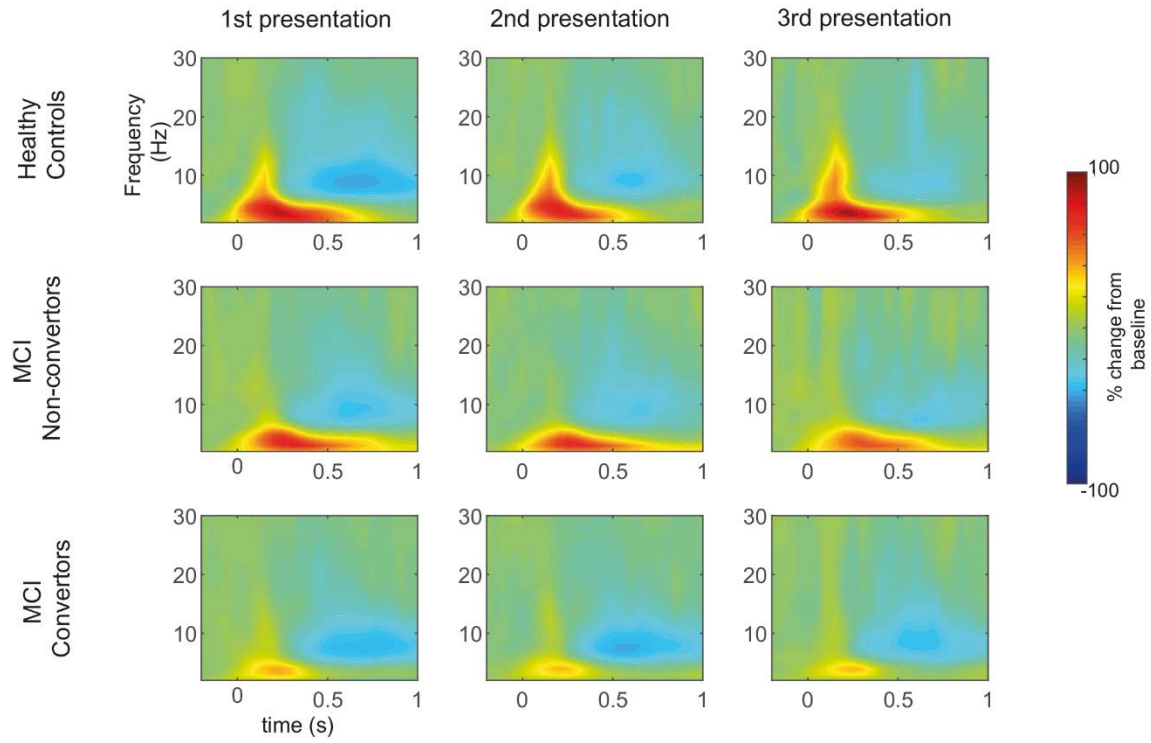

**Supplementary Figure 4.** Time-frequency representations of percentage change in power following word onset, after the first, second and third presentations.
